# Supplementary material for: Three-Fingered RAVERs: Rapid Accumulation of Variations in Exposed Residues of Snake Venom Toxins
Source: MDPI journal article supplement (doi:10.3390/toxins5112172), 2013-11-18
Supplement: s1 [file s1]

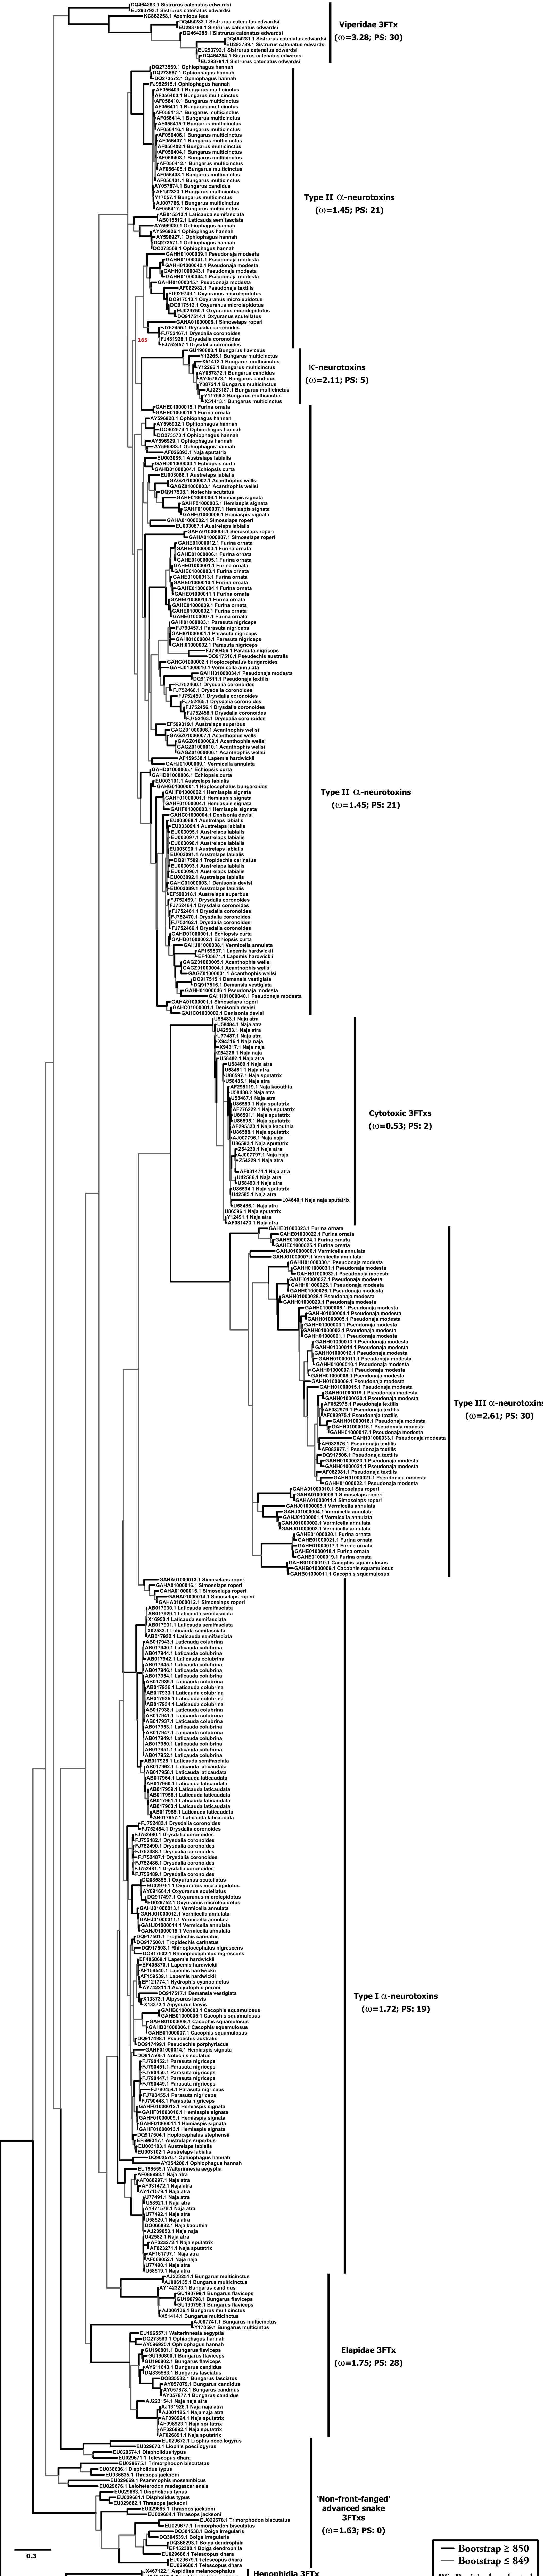

A maximum-likelihood tree (model GTR + I + G;  $\ln L = -21068.86248$ ; Best of NNIs and SPRs) of three-finger toxins is presented here. Node support was evaluated through 1000 bootstrap replicates. Branches with node support of more than 850/1000 replicates are indicated as thick lines. Site-model 8 computed omega and the total number of positively selected sites detected by its Bayes Empirical Bayes (BEB) approach ( $PP \geq 0.95$ ) are also indicated for each toxin clade.
