# Supplementary material for: Three-Fingered RAVERs: Rapid Accumulation of Variations in Exposed Residues of Snake Venom Toxins
Source: MDPI journal article supplement (doi:10.3390/toxins5112172), 2013-11-18
Supplement: s1 [file s1]

**Table 1.** Maximum-likelihood parameter estimates for the plesiotypic 3FTX from ‘non-front-fanged’ advanced snakes

| Model                    | Likelihood (l) | $\omega_0^a$ | Parameters                                                                                                                                                                                                                                                                           | Sign. <sup>b</sup> | No. of Sites with $\omega > 1^c$          | B.E.B |
|--------------------------|----------------|--------------|--------------------------------------------------------------------------------------------------------------------------------------------------------------------------------------------------------------------------------------------------------------------------------------|--------------------|-------------------------------------------|-------|
| M0 (One ratio)           | -3678.383646   | 1.29         | $= \omega_0$                                                                                                                                                                                                                                                                         |                    |                                           | -     |
| M1 (Neutral)             | -3585.956425   | 0.72         | P <sub>0</sub> : 0.314<br>$\omega_0$ : 0.126<br>P <sub>1</sub> : 0.685<br>$\omega_1$ : 1.0                                                                                                                                                                                           |                    |                                           | -     |
| M2 (Selection)*          | -3540.037278   | 1.71         | P <sub>0</sub> : 0.218<br>$\omega_0$ : 0.13<br>P <sub>1</sub> : 0.328<br>$\omega_1$ : 1.0<br>P <sub>2</sub> : 0.452<br>$\omega_2$ : 3.0<br>P <sub>0</sub> : 0.206<br>$\omega_0$ : 0.11<br>P <sub>1</sub> : 0.330<br>$\omega_1$ : 0.91<br>P <sub>2</sub> : 0.462<br>$\omega_2$ : 2.91 | P << 0.001         | 18 (PP $\geq$ 0.99)<br>8 (P $\geq$ 0.95)  |       |
| M3 (Discrete)*           | -3539.925471   | 1.67         | p: 0.34252<br>q: 0.13966<br>p <sub>0</sub> : 0.534<br>p: 0.447<br>q: 0.316<br>p <sub>1</sub> : 0.465<br>$\omega$ : 2.84                                                                                                                                                              | P << 0.001         |                                           | -     |
| M7 (beta)                | -3588.471551   | 0.71         |                                                                                                                                                                                                                                                                                      |                    |                                           | -     |
| M8 (beta and $\omega$ )* | -3539.994764   | 1.63         |                                                                                                                                                                                                                                                                                      | P << 0.001         | 27 (PP $\geq$ 0.99)<br>10 (P $\geq$ 0.95) |       |

**Legend:**

**a:** dn/ds (weighted average)

**b:** Significance of the model in comparison with the null model

**c:** Number of sites with  $\omega > 1$  under the Bayes empirical Bayes approach with a posterior probability (PP) more than or equal to 0.99 and 0.95

\* Models which allow  $\omega > 1$

**Table 2.** Maximum-likelihood parameter estimates for the plesiotypic 3FTX from Viperidae

| Model                                     | Likelihood (l) | $\omega_0^a$ | Parameters                                                                                                                                                                                                                                                                          | Sign. <sup>b</sup> | No. of Sites with $\omega > 1^c$          |
|-------------------------------------------|----------------|--------------|-------------------------------------------------------------------------------------------------------------------------------------------------------------------------------------------------------------------------------------------------------------------------------------|--------------------|-------------------------------------------|
| <b>B.E.B</b>                              |                |              |                                                                                                                                                                                                                                                                                     |                    |                                           |
| <b>M0 (One ratio)</b>                     | -1195.940485   | 1.79         | = $\omega_0$                                                                                                                                                                                                                                                                        |                    | -                                         |
| <b>M1 (Neutral)</b>                       | -1178.683529   | 0.67         | P <sub>0</sub> : 0.344<br>$\omega_0$ : 0.05<br>P <sub>1</sub> : 0.655<br>$\omega_1$ : 1.0                                                                                                                                                                                           |                    | -                                         |
| <b>M2 (Selection)*</b>                    | -1155.587491   | 3.28         | P <sub>0</sub> : 0.454<br>$\omega_0$ : 0.37<br>P <sub>1</sub> : 0.0<br>$\omega_1$ : 1.0<br>P <sub>2</sub> : 0.545<br>$\omega_2$ : 5.70<br>P <sub>0</sub> : 0.427<br>$\omega_0$ : 0.33<br>P <sub>1</sub> : 0.485<br>$\omega_1$ : 4.86<br>P <sub>2</sub> : 0.086<br>$\omega_2$ : 16.4 | P << 0.001         | 13 (PP $\geq$ 0.99)<br>11 (P $\geq$ 0.95) |
| <b>M3 (Discrete)*</b>                     | -1153.672936   | 3.93         | p: 0.03813<br>q: 0.01410<br>p <sub>0</sub> : 0.454<br>p: 58.52<br>q: 99.0<br>p <sub>1</sub> : 0.545<br>$\omega$ : 5.71                                                                                                                                                              | P << 0.001         | -                                         |
| <b>M7 (beta)</b>                          | -1179.346712   | 0.71         |                                                                                                                                                                                                                                                                                     |                    | -                                         |
| <b>M8 (beta and <math>\omega</math>)*</b> | -1155.588330   | 3.28         |                                                                                                                                                                                                                                                                                     | P << 0.001         | 18 (PP $\geq$ 0.99)<br>12 (P > 0.95)      |

**Legend:****a:** dn/ds (weighted average)**b:** Significance of the model in comparison with the null model**c:** Number of sites with  $\omega > 1$  under the Bayes empirical Bayes approach with a posterior probability (PP) more than or equal to 0.99 and 0.95\* Models which allow  $\omega > 1$

**Table 3.** Maximum-likelihood parameter estimates for the plesiotypic 3FTX from Elapidae

| Model                                     | Likelihood (l) | $\omega_0^a$ | Parameters                                                                                                                                                                                                                                                                            | Sign. <sup>b</sup> | No. of Sites with $\omega > 1^c$         |
|-------------------------------------------|----------------|--------------|---------------------------------------------------------------------------------------------------------------------------------------------------------------------------------------------------------------------------------------------------------------------------------------|--------------------|------------------------------------------|
| <b>B.E.B</b>                              |                |              |                                                                                                                                                                                                                                                                                       |                    |                                          |
| <b>M0 (One ratio)</b>                     | -1885.178988   | 1.30         | $= \omega_0$                                                                                                                                                                                                                                                                          |                    | -                                        |
| <b>M1 (Neutral)</b>                       | -1833.771080   | 0.60         | P <sub>0</sub> : 0.419<br>$\omega_0$ : 0.05<br>P <sub>1</sub> : 0.580<br>$\omega_1$ : 1.0                                                                                                                                                                                             |                    | -                                        |
| <b>M2 (Selection)*</b>                    | -1807.546142   | 1.79         | P <sub>0</sub> : 0.355<br>$\omega_0$ : 0.08<br>P <sub>1</sub> : 0.249<br>$\omega_1$ : 1.0<br>P <sub>2</sub> : 0.395<br>$\omega_2$ : 3.83<br>P <sub>0</sub> : 0.313<br>$\omega_0$ : 0.24<br>P <sub>1</sub> : 0.279<br>$\omega_1$ : 0.81<br>P <sub>2</sub> : 0.407<br>$\omega_2$ : 3.70 | P << 0.001         | 15 (PP $\geq$ 0.99)<br>9 (P $\geq$ 0.95) |
| <b>M3 (Discrete)*</b>                     | -1807.476797   | 1.75         | p: 0.03086<br>q: 0.01787<br>p <sub>0</sub> : 0.594<br>p: 0.236<br>q: 0.325<br>p <sub>1</sub> : 0.405<br>$\omega$ : 3.72                                                                                                                                                               | P << 0.001         | -                                        |
| <b>M7 (beta)</b>                          | -1835.536623   | 0.61         |                                                                                                                                                                                                                                                                                       |                    | -                                        |
| <b>M8 (beta and <math>\omega</math>)*</b> | -1807.523245   | 1.75         |                                                                                                                                                                                                                                                                                       | P << 0.001         | 22 (PP $\geq$ 0.99)<br>6 (P > 0.95)      |

**Legend:****a:** dn/ds (weighted average)**b:** Significance of the model in comparison with the null model**c:** Number of sites with  $\omega > 1$  under the Bayes empirical Bayes approach with a posterior probability (PP) more than or equal to 0.99 and 0.95\* Models which allow  $\omega > 1$

**Table 4.** Maximum-likelihood parameter estimates for type I (short-chain)  $\alpha$ -neurotoxins

| Model                    | Likelihood (l) | $\omega_0^a$ | Parameters                                                                                                                                                                                                                                                                            | Sign. <sup>b</sup> | No. of Sites with $\omega > 1^c$    | B.E.B |
|--------------------------|----------------|--------------|---------------------------------------------------------------------------------------------------------------------------------------------------------------------------------------------------------------------------------------------------------------------------------------|--------------------|-------------------------------------|-------|
| M0 (One ratio)           | -3446.886907   | 1.92         | $= \omega_0$                                                                                                                                                                                                                                                                          |                    |                                     | -     |
| M1 (Neutral)             | -3372.647732   | 0.57         | P <sub>0</sub> : 0.485<br>$\omega_0$ : 0.12<br>P <sub>1</sub> : 0.514<br>$\omega_1$ : 1.0                                                                                                                                                                                             |                    |                                     | -     |
| M2 (Selection)*          | -3285.128559   | 1.61         | P <sub>0</sub> : 0.349<br>$\omega_0$ : 0.16<br>P <sub>1</sub> : 0.369<br>$\omega_1$ : 1.0<br>P <sub>2</sub> : 0.280<br>$\omega_2$ : 4.24<br>P <sub>0</sub> : 0.487<br>$\omega_0$ : 0.33<br>P <sub>1</sub> : 0.410<br>$\omega_1$ : 2.67<br>P <sub>2</sub> : 0.102<br>$\omega_2$ : 8.86 | P << 0.001         | 11 (PP $\geq$ 0.99)<br>2 (P > 0.95) |       |
| M3 (Discrete)*           | -3264.912926   | 2.16         | p:0.28637<br>q:0.21125<br>p <sub>0</sub> : 0.703<br>p: 0.303<br>q: 0.193<br>p <sub>1</sub> : 0.296<br>$\omega$ : 4.35                                                                                                                                                                 | P << 0.001         |                                     | -     |
| M7 (beta)                | -3380.125103   | 0.57         |                                                                                                                                                                                                                                                                                       |                    |                                     | -     |
| M8 (beta and $\omega$ )* | -3287.175727   | 1.72         |                                                                                                                                                                                                                                                                                       | P << 0.001         | 13 (PP $\geq$ 0.99)<br>6 (P > 0.95) |       |

**Legend:****a:** dn/ds (weighted average)**b:** Significance of the model in comparison with the null model**c:** Number of sites with  $\omega > 1$  under the Bayes empirical Bayes approach with a posterior probability (PP) more than or equal to 0.99 and 0.95\* Models which allow  $\omega > 1$

**Table 5.** Maximum-likelihood parameter estimates for type II (long-chain)  $\alpha$ -neurotoxins

| Model                                     | Likelihood (l) | $\omega_0^a$ | Parameters                                                                                                                                                                                                                                                                             | Sign. <sup>b</sup> | No. of Sites with $\omega > 1^c$    |
|-------------------------------------------|----------------|--------------|----------------------------------------------------------------------------------------------------------------------------------------------------------------------------------------------------------------------------------------------------------------------------------------|--------------------|-------------------------------------|
|                                           |                |              |                                                                                                                                                                                                                                                                                        |                    | B.E.B                               |
| <b>M0 (One ratio)</b>                     | -7338.701541   | 2.01         | $= \omega_0$                                                                                                                                                                                                                                                                           |                    | -                                   |
| <b>M1 (Neutral)</b>                       | -7080.814722   | 0.62         | P <sub>0</sub> : 0.405<br>$\omega_0$ : 0.06<br>P <sub>1</sub> : 0.594<br>$\omega_1$ : 1.0                                                                                                                                                                                              |                    | -                                   |
| <b>M2 (Selection)*</b>                    | -6845.160604   | 1.43         | P <sub>0</sub> : 0.384<br>$\omega_0$ : 0.10<br>P <sub>1</sub> : 0.356<br>$\omega_1$ : 1.0<br>P <sub>2</sub> : 0.259<br>$\omega_2$ : 4.008<br>P <sub>0</sub> : 0.402<br>$\omega_0$ : 0.18<br>P <sub>1</sub> : 0.461<br>$\omega_1$ : 2.54<br>P <sub>2</sub> : 0.136<br>$\omega_2$ : 8.28 | P << 0.001         | 17 (PP $\geq$ 0.99)<br>2 (P > 0.95) |
| <b>M3 (Discrete)*</b>                     | -6801.590700   | 2.37         | p: 0.18047<br>q: 0.16001<br>p <sub>0</sub> : 0.736<br>p: 0.210<br>q: 0.168<br>p <sub>1</sub> : 0.263<br>$\omega$ : 3.97                                                                                                                                                                | P << 0.001         | -                                   |
| <b>M7 (beta)</b>                          | -7078.743858   | 0.53         |                                                                                                                                                                                                                                                                                        |                    | -                                   |
| <b>M8 (beta and <math>\omega</math>)*</b> | -6853.164183   | 1.45         |                                                                                                                                                                                                                                                                                        | P << 0.001         | 19 (PP $\geq$ 0.99)<br>2 (P > 0.95) |

**Legend:****a:** dn/ds (weighted average)**b:** Significance of the model in comparison with the null model**c:** Number of sites with  $\omega > 1$  under the Bayes empirical Bayes approach with a posterior probability (PP) more than or equal to 0.99 and 0.95\* Models which allow  $\omega > 1$

**Table 6.** Maximum-likelihood parameter estimates for type III  $\alpha$ -neurotoxins

| Model                                     | Likelihood (l) | $\omega_0^a$ | Parameters                                                                                                                                                                                                         | Sign. <sup>b</sup> | No. of Sites with $\omega > 1^c$        |
|-------------------------------------------|----------------|--------------|--------------------------------------------------------------------------------------------------------------------------------------------------------------------------------------------------------------------|--------------------|-----------------------------------------|
| <b>B.E.B</b>                              |                |              |                                                                                                                                                                                                                    |                    |                                         |
| <b>M0 (One ratio)</b>                     | -3312.727326   | 2.59         | $= \omega_0$                                                                                                                                                                                                       |                    | -                                       |
| <b>M1 (Neutral)</b>                       | -3210.492742   | 0.58         | $P_0: 0.428$<br>$\omega_0: 0.04$<br>$P_1: 0.571$<br>$\omega_1: 1.0$                                                                                                                                                |                    | -                                       |
| <b>M2 (Selection)*</b>                    | -3089.176251   | 2.59         | $P_0: 0.333$<br>$\omega_0: 0.03$<br>$P_1: 0.247$<br>$\omega_1: 1.0$<br>$P_2: 0.418$<br>$\omega_2: 5.57$<br>$P_0: 0.413$<br>$\omega_0: 0.12$<br>$P_1: 0.272$<br>$\omega_1: 2.58$<br>$P_2: 0.314$<br>$\omega_2: 8.0$ | $P << 0.001$       | 26 (PP $\geq 0.99$ )<br>1 (P $> 0.95$ ) |
| <b>M3 (Discrete)*</b>                     | -3079.356207   | 3.27         | $p: 0.01764$<br>$q: 0.02272$<br>$p_0: 0.577$<br>$p: 0.019$<br>$q: 0.025$<br>$p_1: 0.422$<br>$\omega: 5.61$                                                                                                         | $P << 0.001$       | -                                       |
| <b>M7 (beta)</b>                          | -3215.119806   | 0.42         |                                                                                                                                                                                                                    |                    | -                                       |
| <b>M8 (beta and <math>\omega</math>)*</b> | -3089.367982   | 2.61         |                                                                                                                                                                                                                    | $P << 0.001$       | 26 (PP $\geq 0.99$ )<br>4 (P $> 0.95$ ) |

**Legend:****a:** dn/ds (weighted average)**b:** Significance of the model in comparison with the null model**c:** Number of sites with  $\omega > 1$  under the Bayes empirical Bayes approach with a posterior probability (PP) more than or equal to 0.99 and 0.95\* Models which allow  $\omega > 1$

**Table 7.** Maximum-likelihood parameter estimates for *Oxyuranus* / *Pseudonaja* Type II (long-chain)  $\alpha$ -neurotoxin with cysteine doublet

| Model                                     | Likelihood (l) | $\omega_0^a$ | Parameters                                                                                                                                                                                                                                                                            | Sign. <sup>b</sup> | No. of Sites with $\omega > 1^c$    |
|-------------------------------------------|----------------|--------------|---------------------------------------------------------------------------------------------------------------------------------------------------------------------------------------------------------------------------------------------------------------------------------------|--------------------|-------------------------------------|
| <b>B.E.B</b>                              |                |              |                                                                                                                                                                                                                                                                                       |                    |                                     |
| <b>M0 (One ratio)</b>                     | -953.657356    | 0.97         | $= \omega_0$                                                                                                                                                                                                                                                                          |                    | -                                   |
| <b>M1 (Neutral)</b>                       | -943.204575    | 0.62         | P <sub>0</sub> : 0.375<br>$\omega_0$ : 0.0<br>P <sub>1</sub> : 0.624<br>$\omega_1$ : 1.0                                                                                                                                                                                              |                    | -                                   |
| <b>M2 (Selection)*</b>                    | -918.331297    | 3.57         | P <sub>0</sub> : 0.157<br>$\omega_0$ : 0.0<br>P <sub>1</sub> : 0.529<br>$\omega_1$ : 1.0<br>P <sub>2</sub> : 0.312<br>$\omega_2$ : 9.75<br>P <sub>0</sub> : 0.625<br>$\omega_0$ : 0.62<br>P <sub>1</sub> : 0.341<br>$\omega_1$ : 8.51<br>P <sub>2</sub> : 0.032<br>$\omega_2$ : 47.15 | P << 0.001         | 10 (PP $\geq$ 0.99)<br>7 (P > 0.95) |
| <b>M3 (Discrete)*</b>                     | -916.570131    | 4.82         | p: 0.00754<br>q: 0.00500<br>p <sub>0</sub> : 0.674<br>p: 17.55<br>q: 6.79<br>p <sub>1</sub> : 0.325<br>$\omega$ : 9.77                                                                                                                                                                | P << 0.001         | -                                   |
| <b>M7 (beta)</b>                          | -943.258977    | 0.60         |                                                                                                                                                                                                                                                                                       |                    | -                                   |
| <b>M8 (beta and <math>\omega</math>)*</b> | -918.427424    | 3.67         |                                                                                                                                                                                                                                                                                       | P << 0.001         | 11 (PP $\geq$ 0.99)<br>7 (P > 0.95) |

**Legend:**

**a:** dn/ds (weighted average)

**b:** Significance of the model in comparison with the null model

**c:** Number of sites with  $\omega > 1$  under the Bayes empirical Bayes approach with a posterior probability (PP) more than or equal to 0.99 and 0.95

\* Models which allow  $\omega > 1$

**Table 8.** Maximum-likelihood parameter estimates for *Oxyuranus* / *Pseudonaja* Type II (long-chain)  $\alpha$ -neurotoxin without cysteine doublet

| Model                                     | Likelihood (l) | $\omega_0^a$ | Parameters                                                                                                                                | Sign. <sup>b</sup> | No. of Sites with $\omega > 1^c$    |
|-------------------------------------------|----------------|--------------|-------------------------------------------------------------------------------------------------------------------------------------------|--------------------|-------------------------------------|
| <b>B.E.B</b>                              |                |              |                                                                                                                                           |                    |                                     |
| <b>M0 (One ratio)</b>                     | -843.272386    | 2.69         | $= \omega_0$                                                                                                                              |                    | -                                   |
| <b>M1 (Neutral)</b>                       | -845.722868    | 0.76         | P <sub>0</sub> : 0.237<br>$\omega_0$ : 0.0<br>P <sub>1</sub> : 0.762<br>$\omega_1$ : 1.0                                                  |                    | -                                   |
| <b>M2 (Selection)*</b>                    | -832.929158    | 3.41         | P <sub>0</sub> : 0.416<br>$\omega_0$ : 0.06<br>P <sub>1</sub> : 0.0<br>$\omega_1$ : 1.0<br>P <sub>2</sub> : 0.583<br>$\omega_2$ : 5.80    | P << 0.001         | 2 (PP $\geq$ 0.99)<br>12 (P > 0.95) |
| <b>M3 (Discrete)*</b>                     | -832.929158    | 3.41         | P <sub>0</sub> : 0.416<br>$\omega_0$ : 0.06<br>P <sub>1</sub> : 0.476<br>$\omega_1$ : 5.80<br>P <sub>2</sub> : 0.107<br>$\omega_2$ : 5.80 | P << 0.001         | -                                   |
| <b>M7 (beta)</b>                          | -846.563004    | 0.90         | p: 0.04683<br>q: 0.00500<br>p <sub>0</sub> : 0.416<br>p: 6.49                                                                             |                    | -                                   |
| <b>M8 (beta and <math>\omega</math>)*</b> | -832.929285    | 3.41         | q: 98.96<br>p <sub>1</sub> : 0.583<br>$\omega$ : 5.80                                                                                     | P << 0.001         | 9 (PP $\geq$ 0.99)<br>11 (P > 0.95) |

**Legend:**

**a:** dn/ds (weighted average)

**b:** Significance of the model in comparison with the null model

**c:** Number of sites with  $\omega > 1$  under the Bayes empirical Bayes approach with a posterior probability (PP) more than or equal to 0.99 and 0.95

\* Models which allow  $\omega > 1$



**Table 9.** Maximum-likelihood parameter estimates for kappa three-finger toxins

| Model                                     | Likelihood (l) | $\omega_0^a$ | Parameters                                                                                                                                 | Sign. <sup>b</sup> | No. of Sites with $\omega > 1^c$         |
|-------------------------------------------|----------------|--------------|--------------------------------------------------------------------------------------------------------------------------------------------|--------------------|------------------------------------------|
| <b>B.E.B</b>                              |                |              |                                                                                                                                            |                    |                                          |
| <b>M0 (One ratio)</b>                     | -745.132731    | 1.64         | $= \omega_0$                                                                                                                               |                    | -                                        |
| <b>M1 (Neutral)</b>                       | -743.698028    | 0.66         | $P_0: 0.344$<br>$\omega_0: 0.03$<br>$P_1: 0.655$<br>$\omega_1: 1.0$                                                                        |                    | -                                        |
| <b>M2 (Selection)*</b>                    | -728.968534    | 2.11         | $P_0: 0.782$<br>$\omega_0: 1.0$<br>$P_1: 0.124$<br>$\omega_1: 1.0$<br>$P_2: 0.09$<br>$\omega_2: 12.96$<br>$P_0: 0.871$<br>$\omega_0: 0.95$ | $P << 0.001$       | 3 ( $PP \geq 0.99$ )<br>2 ( $P > 0.95$ ) |
| <b>M3 (Discrete)*</b>                     | -728.457588    | 2.30         | $P_1: 0.1$<br>$\omega_1: 7.61$<br>$P_2: 0.2$<br>$\omega_2: 25.61$                                                                          | $P << 0.001$       | -                                        |
| <b>M7 (beta)</b>                          | -743.727286    | 0.70         | $p: 0.01191$<br>$q: 0.00500$<br>$p_0: 0.906$<br>$p: 3.212$                                                                                 |                    | -                                        |
| <b>M8 (beta and <math>\omega</math>)*</b> | -728.968534    | 2.11         | $q: 0.005$<br>$p_1: 0.093$<br>$\omega: 12.96$                                                                                              | $P << 0.001$       | 3 ( $PP \geq 0.99$ )<br>2 ( $P > 0.95$ ) |

**Legend:****a:** dn/ds (weighted average)**b:** Significance of the model in comparison with the null model**c:** Number of sites with  $\omega > 1$  under the Bayes empirical Bayes approach with a posterior probability (PP) more than or equal to 0.99 and 0.95\* Models which allow  $\omega > 1$

**Table 10.** Maximum-likelihood parameter estimates for cytotoxic three-finger toxins

| Model                                     | Likelihood (l) | $\omega_0^a$ | Parameters                                                                                                                                                                                                                                                                           | Sign. <sup>b</sup> | No. of Sites with $\omega > 1^c$        |
|-------------------------------------------|----------------|--------------|--------------------------------------------------------------------------------------------------------------------------------------------------------------------------------------------------------------------------------------------------------------------------------------|--------------------|-----------------------------------------|
| <b>B.E.B</b>                              |                |              |                                                                                                                                                                                                                                                                                      |                    |                                         |
| <b>M0 (One ratio)</b>                     | -970.316160    | 0.32         | $= \omega_0$                                                                                                                                                                                                                                                                         |                    | -                                       |
| <b>M1 (Neutral)</b>                       | -952.107186    | 0.33         | P <sub>0</sub> : 0.712<br>$\omega_0$ : 0.06<br>P <sub>1</sub> : 0.287<br>$\omega_1$ : 1.0                                                                                                                                                                                            |                    | -                                       |
| <b>M2 (Selection)*</b>                    | -945.995693    | 0.57         | P <sub>0</sub> : 0.675<br>$\omega_0$ : 0.06<br>P <sub>1</sub> : 0.294<br>$\omega_1$ : 1.0<br>P <sub>2</sub> : 0.029<br>$\omega_2$ : 8.18<br>P <sub>0</sub> : 0.518<br>$\omega_0$ : 0.0<br>P <sub>1</sub> : 0.446<br>$\omega_1$ : 0.62<br>P <sub>2</sub> : 0.034<br>$\omega_2$ : 7.02 | P << 0.001         | 1 (PP $\geq$ 0.99)<br>1 (P $\geq$ 0.95) |
| <b>M3 (Discrete)*</b>                     | -945.501674    | 0.52         | p: 0.13885<br>q: 0.29569<br>p <sub>0</sub> : 0.969<br>p: 0.173<br>q: 0.387<br>p <sub>1</sub> : 0.03<br>$\omega$ : 7.53                                                                                                                                                               | P < 0.01           | -                                       |
| <b>M7 (beta)</b>                          | -952.219533    | 0.31         |                                                                                                                                                                                                                                                                                      |                    | -                                       |
| <b>M8 (beta and <math>\omega</math>)*</b> | -945.530089    | 0.53         |                                                                                                                                                                                                                                                                                      | P < 0.01           | 2 (PP $\geq$ 0.99)<br>0 (P > 0.95)      |

**Legend:****a:** dn/ds (weighted average)**b:** Significance of the model in comparison with the null model**c:** Number of sites with  $\omega > 1$  under the Bayes empirical Bayes approach with a posterior probability (PP) more than or equal to 0.99 and 0.95\* Models which allow  $\omega > 1$ **p > 0.05<sup>N.S.</sup>:** Not significant at 0.05

**Supplementary Table 11.** Nucleotide and complementary amino acid-level selection assessment

| Site                         |    | CodeML                   |                          | TreeSAAP                               |                        | ASA                   |
|------------------------------|----|--------------------------|--------------------------|----------------------------------------|------------------------|-----------------------|
| Codon                        | AA | M2a <sup>a</sup>         | M8 <sup>b</sup>          | Property <sup>c</sup>                  | Magnitude <sup>d</sup> |                       |
| Type I $\alpha$ neurotoxins  |    |                          |                          |                                        |                        |                       |
| 22                           | M  | 4.428±0.412<br>(0.989)*  | 4.456±0.247<br>(0.998)** | —                                      | —                      | 35.5<br>NA            |
| 37                           | M  | 4.466±0.209<br>(1.0)**   | 4.461±0.201<br>(1.0)**   | $\alpha c$                             | 6                      | 39.9<br>Part. Exposed |
| 39                           | A  | 4.444±0.341<br>(0.994)** | 4.456±0.243<br>(0.999)** | $\alpha c$                             | 6                      | 95.5<br>Exposed       |
| 40                           | -  | 4.290±0.783<br>(0.950)   | 4.407±0.479<br>(0.985)*  | $\alpha c$                             | 6                      | 100<br>Exposed        |
| 43                           | S  | 4.274±0.813<br>(0.945)   | 4.424±0.411<br>(0.990)*  | <i>Hnc</i> , $\alpha c$                | 7, 6                   | 69.5<br>Exposed       |
| 49                           | T  | 4.466±0.208<br>(1.0)**   | 4.461±0.201<br>(1.0)**   | <i>Hnc</i> , $\alpha c$                | 7, 6                   | 66.4<br>Exposed       |
| 51                           | R  | 4.466±0.208<br>(1.0)**   | 4.461±0.201<br>(1.0)**   | <i>Hnc</i> , $R_{\alpha}$              | 8, 6                   | 96.4<br>Exposed       |
| 53                           | H  | 4.466±0.210<br>(1.0)**   | 4.461±0.202<br>(1.0)**   | <i>Hnc</i> , $R_{\alpha}$              | 8, 6                   | 90.2<br>Exposed       |
| 56                           | T  | 4.224±0.900<br>(0.931)   | 4.403±0.493<br>(0.984)*  | <i>Hnc</i> , $\alpha c$ , $R_{\alpha}$ | 8, 8, 6                | 77.9<br>Exposed       |
| 57                           | I  | 4.428±0.414<br>(0.989)*  | 4.455±0.253<br>(0.998)** | <i>Hnc</i> , $\alpha c$ , $R_{\alpha}$ | 8, 8, 6                | 72.6<br>Exposed       |
| 58                           | I  | 4.147±1.014<br>(0.909)   | 4.392±0.527<br>(0.981)*  | <i>Hnc</i> , $\alpha c$ , $R_{\alpha}$ | 8, 8, 6                | 8.7<br>Buried         |
| 66                           | K  | 4.466±0.208<br>(1.0)**   | 4.461±0.201<br>(1.0)**   | <i>Hnc</i> , $\alpha c$ , $R_{\alpha}$ | 8, 6, 6                | 40.5<br>Part. Exposed |
| 69                           | P  | 4.466±0.208<br>(1.0)**   | 4.461±0.201<br>(1.0)**   | <i>Hnc</i> , $\alpha c$ , $R_{\alpha}$ | 8, 6, 6                | 99.7<br>Exposed       |
| 70                           | G  | 4.455±0.283<br>(0.997)** | 4.459±0.219<br>(0.999)** | <i>Hnc</i> , $\alpha c$ , $R_{\alpha}$ | 8, 7, 6                | 98<br>Exposed         |
| 71                           | I  | 3.812±1.360<br>(0.814)   | 4.289±0.782<br>(0.952)*  | $\alpha c$                             | 7                      | 23.5<br>NA            |
| 72                           | K  | 4.466±0.208<br>(1.0)**   | 4.461±0.201<br>(1.0)**   | $\alpha c$                             | 7                      | 65.9<br>Exposed       |
| 73                           | L  | 3.990±1.202<br>(0.864)   | 4.310±0.741<br>(0.958)*  | $\alpha c$                             | 7                      | 14.2<br>Buried        |
| 74                           | E  | 4.466±0.208<br>(1.0)**   | 4.461±0.201<br>(1.0)**   | <i>Hnc</i> , $\alpha c$                | 7, 7                   | 69.8<br>Exposed       |
| 77                           | K  | 4.466±0.208<br>(1.0)**   | 4.461±0.201<br>(1.0)**   | <i>Hnc</i> , $\alpha c$                | 7, 7                   | 41.3<br>Part. Exposed |
| Type II $\alpha$ neurotoxins |    |                          |                          |                                        |                        |                       |
| 22                           | L  | 4.248±0.434<br>(1.0)**   | 3.612±0.649<br>(0.965)*  | <i>b</i>                               | 6                      | 17.7<br>Buried        |

| Site                   |   | CodeML                   |                          | TreeSAAP                 |      | ASA                   |
|------------------------|---|--------------------------|--------------------------|--------------------------|------|-----------------------|
| 26                     | M | 4.248±0.434<br>(1.0)**   | 3.735±0.424<br>(1.0)**   | <i>b</i>                 | 6    | 0<br>Buried           |
| 29                     | P | 4.248±0.434<br>(1.0)**   | 3.735±0.424<br>(1.0)**   | <i>b</i>                 | 6    | 100<br>Exposed        |
| 30                     | K | 4.235±0.477<br>(0.996)** | 3.733±0.428<br>(1.0)**   | <i>b</i>                 | 6    | 46<br>Part. Exposed   |
| 31                     | T | 4.248±0.434<br>(1.0)**   | 3.735±0.424<br>(1.0)**   | <i>b</i>                 | 6    | 38.3<br>NA            |
| 33                     | R | 4.248±0.434<br>(1.0)**   | 3.735±0.424<br>(1.0)**   | <i>b</i>                 | 6    | 45.7<br>Part. Exposed |
| 39                     | E | 4.217±0.529<br>(0.991)** | 3.730±0.434<br>(0.999)** | <i>pK<sup>1</sup>, b</i> | 7, 6 | 62.4<br>Exposed       |
| 40                     | N | 4.247±0.436<br>(1.0)**   | 3.735±0.424<br>(1.0)**   | <i>pK<sup>1</sup>, b</i> | 7, 6 | 70.4<br>Exposed       |
| 41                     | L | 4.245±0.445<br>(0.999)** | 3.734±0.426<br>(1.0)**   | <i>pK<sup>1</sup>, b</i> | 7, 6 | 18.4<br>Buried        |
| 50                     | P | 4.248±0.434<br>(1.0)**   | 3.735±0.424<br>(1.0)**   | <i>pK<sup>1</sup>, b</i> | 8, 8 | 57.7<br>Exposed       |
| 51                     | R | 4.248±0.434<br>(1.0)**   | 3.735±0.424<br>(1.0)**   | <i>pK<sup>1</sup>, b</i> | 8, 8 | 50.9<br>Exposed       |
| 53                     | S | 4.248±0.434<br>(1.0)**   | 3.735±0.424<br>(1.0)**   | <i>pK<sup>1</sup>, b</i> | 8, 8 | 56.7<br>Exposed       |
| 54                     | S | 4.248±0.434<br>(1.0)**   | 3.735±0.424<br>(1.0)**   | <i>pK<sup>1</sup>, b</i> | 8, 8 | 80.2<br>Exposed       |
| 58                     | L | 4.248±0.434<br>(1.0)**   | 3.735±0.424<br>(1.0)**   | <i>pK<sup>1</sup>, b</i> | 7, 8 | 41.8<br>Part. Exposed |
| 69                     | I | 4.248±0.434<br>(1.0)**   | 3.735±0.424<br>(1.0)**   | <i>pK<sup>1</sup>, b</i> | 7, 6 | 84.6<br>Exposed       |
| 70                     | P | 4.248±0.434<br>(1.0)**   | 3.735±0.424<br>(1.0)**   | <i>pK<sup>1</sup>, b</i> | 8, 6 | —                     |
| 72                     | S | 4.200±0.575<br>(0.986)*  | 3.726±0.445<br>(0.997)** | <i>pK<sup>1</sup></i>    | 8    | 100<br>Exposed        |
| 73                     | Y | 3.548±1.343<br>(0.799)   | 3.613±0.650<br>(0.964)** | <i>pK<sup>1</sup></i>    | 8    | 75.4<br>Exposed       |
| 74                     | E | 4.145±0.698<br>(0.971)*  | 3.719±0.460<br>(0.996)** | <i>pK<sup>1</sup></i>    | 8    | 23.8<br>NA            |
| 75                     | D | 4.248±0.435<br>(1.0)**   | 3.735±0.424<br>(1.0)**   | <i>pK<sup>1</sup></i>    | 8    | 61.4<br>Exposed       |
| 77                     | T | 4.248±0.434<br>(1.0)**   | 3.735±0.424<br>(1.0)**   | <i>pK<sup>1</sup></i>    | 8    | 36.6<br>NA            |
| Type III α neurotoxins |   |                          |                          |                          |      |                       |
| 23                     | T | 5.542±0.211<br>(1.0)**   | 5.519±0.166<br>(1.0)**   | Esm                      | 6    | 51.1<br>Exposed       |
| 26                     | K | 5.539±0.237<br>(0.999)** | 5.518±0.178<br>(1.0)**   | Esm                      | 6    | 49.5<br>Exposed       |

| Site |   | CodeML                   |                          | TreeSAAP |   | ASA                   |
|------|---|--------------------------|--------------------------|----------|---|-----------------------|
| 27   | G | 5.542±0.209<br>(1.0)**   | 5.519±0.165<br>(1.0)**   | Esm      | 6 | 61.9<br>Exposed       |
| 28   | Y | 5.542±0.209<br>(1.0)**   | 5.519±0.165<br>(1.0)**   | Esm      | 6 | 88.6<br>Exposed       |
| 29   | H | 5.542±0.209<br>(1.0)**   | 5.519±0.165<br>(1.0)**   | Esm      | 6 | 52.7<br>Exposed       |
| 30   | D | 5.536±0.262<br>(1.0)**   | 5.517±0.195<br>(0.999)** | Esm      | 6 | —                     |
| 35   | K | 5.542±0.211<br>(1.0)**   | 5.519±0.167<br>(0.999)** | Esm      | 6 | 53.4<br>Exposed       |
| 36   | P | 5.541±0.224<br>(1.0)**   | 5.518±0.173<br>(1.0)**   | —        | — | 99.7<br>Exposed       |
| 37   | H | 5.270±1.084<br>(0.941)   | 5.394±0.757<br>(0.973)*  | —        | — | 75.4<br>Exposed       |
| 43   | E | 5.542±0.209<br>(1.0)**   | 5.519±0.165<br>(1.0)**   | —        | — | 28.8<br>NA            |
| 45   | F | 5.542±0.209<br>(1.0)**   | 5.519±0.165<br>(1.0)**   | —        | — | 22.8<br>NA            |
| 46   | I | 5.542±0.209<br>(1.0)**   | 5.519±0.165<br>(1.0)**   | —        | — | 58.7<br>Exposed       |
| 47   | P | 5.540±0.232<br>(0.999)** | 5.518±0.177<br>(0.999)** | —        | — | 96.4<br>Exposed       |
| 48   | A | 5.542±0.209<br>(1.0)**   | 5.519±0.166<br>(1.0)**   | —        | — | 73.7<br>Exposed       |
| 49   | T | 5.542±0.210<br>(1.0)**   | 5.519±0.166<br>(1.0)**   | —        | — | 69.1<br>Exposed       |
| 50   | H | 5.360±0.904<br>(0.961)*  | 5.438±0.620<br>(0.983)*  | —        | — | 58.1<br>Exposed       |
| 51   | G | 5.214±1.172<br>(0.930)   | 5.393±0.758<br>(0.973)*  | —        | — | 77.1<br>Exposed       |
| 52   | N | 5.542±0.209<br>(1.0)**   | 5.519±0.165<br>(1.0)**   | —        | — | 90.3<br>Exposed       |
| 53   | A | 5.536±0.269<br>(0.999)** | 5.516±0.201<br>(0.999)** | —        | — | 47.6<br>Part. Exposed |
| 54   | I | 5.542±0.209<br>(1.0)**   | 5.519±0.165<br>(1.0)**   | —        | — | 11.7<br>Buried        |
| 55   | L | 5.542±0.209<br>(1.0)**   | 5.519±0.165<br>(1.0)**   | —        | — | 35.9<br>NA            |
| 56   | A | 5.542±0.209<br>(1.0)**   | 5.519±0.165<br>(1.0)**   | —        | — | 45.2<br>Part. Exposed |
| 57   | R | 5.196±1.205<br>(0.925)   | 5.367±0.829<br>(0.967)** | —        | — | 16<br>Buried          |
| 60   | G | 5.542±0.211<br>(1.0)**   | 5.519±0.166<br>(1.0)**   | Esm      | 6 | 22.8<br>NA            |

| Site                                                                      |   | CodeML                   |                          | TreeSAAP |   | ASA                   |
|---------------------------------------------------------------------------|---|--------------------------|--------------------------|----------|---|-----------------------|
| 65                                                                        | G | 5.542±0.209<br>(1.0)**   | 5.519±0.165<br>(1.0)**   | Esm      | 6 | 77.9<br>Exposed       |
| 66                                                                        | G | 5.542±0.209<br>(1.0)**   | 5.519±0.166<br>(1.0)**   | Esm      | 6 | 100<br>Exposed        |
| 67                                                                        | I | 5.539±0.243<br>(0.999)** | 5.518±0.181<br>(1.0)**   | Esm      | 6 | 60.4<br>Exposed       |
| 68                                                                        | R | 5.542±0.209<br>(1.0)**   | 5.519±0.165<br>(1.0)**   | Esm      | 6 | 12<br>Buried          |
| 69                                                                        | P | 5.542±0.209<br>(1.0)**   | 5.519±0.165<br>(1.0)**   | Esm      | 6 | —                     |
| 79                                                                        | K | 5.542±0.209<br>(1.0)**   | 5.519±0.165<br>(1.0)**   | —        | — | —                     |
| Plesiotypic $\alpha$ -neurotoxins from 'non-front-fanged' advanced snakes |   |                          |                          |          |   |                       |
| 21                                                                        | H | 3.082±0.722<br>(0.926)   | 2.484±0.206<br>(0.986)*  | —        | — | 38.5<br>NA            |
| 22                                                                        | G | 3.259±0.429<br>(1.0)**   | 2.507±0.086<br>(1.0)**   | —        | — | 13.4<br>Buried        |
| 23                                                                        | F | 3.246±0.460<br>(0.994)** | 2.505±0.106<br>(0.998)** | —        | — | 46.3<br>Part. Exposed |
| 25                                                                        | L | 3.255±0.438<br>(0.998)** | 2.506±0.092<br>(0.999)** | —        | — | 0.4<br>Buried         |
| 29                                                                        | — | 3.039±0.773<br>(0.907)   | 2.462±0.278<br>(0.973)*  | —        | — | —                     |
| 30                                                                        | R | 3.258±0.431<br>(0.999)** | 2.507±0.089<br>(1.0)**   | —        | — | 31.7<br>NA            |
| 32                                                                        | T | 3.161±0.619<br>(0.958)*  | 2.486±0.203<br>(0.987)*  | —        | — | 58.3<br>Exposed       |
| 33                                                                        | W | 3.206±0.542<br>(0.977)*  | 2.493±0.172<br>(0.991)** | —        | — | 99<br>Exposed         |
| 34                                                                        | S | 3.258±0.431<br>(0.999)** | 2.507±0.090<br>(1.0)**   | —        | — | 52.8<br>Exposed       |
| 37                                                                        | S | 3.259±0.428<br>(1.0)**   | 2.507±0.084<br>(1.0)**   | —        | — | 92.7<br>Exposed       |
| 38                                                                        | I | 3.259±0.428<br>(1.0)**   | 2.507±0.085<br>(1.0)**   | —        | — | 46.6<br>Part. Exposed |
| 39                                                                        | G | 3.257±0.433<br>(0.999)** | 2.507±0.089<br>(1.0)**   | —        | — | 9.2<br>Buried         |
| 40                                                                        | H | 3.258±0.430<br>(0.999)** | 2.507±0.087<br>(1.0)**   | —        | — | 60.6<br>Exposed       |
| 41                                                                        | R | 2.998±0.810<br>(0.891)   | 2.477±0.229<br>(0.982)*  | —        | — | 82.2<br>Exposed       |
| 43                                                                        | L | 3.259±0.429<br>(1.0)**   | 2.507±0.086<br>(1.0)**   | —        | — | 82.7<br>Exposed       |
| 44                                                                        | P | 3.126±0.664<br>(0.945)   | 2.492±0.175<br>(0.991)** | —        | — | 50.8<br>Exposed       |

| Site                                                             |   | CodeML                                 |                                        | TreeSAAP             |          | ASA                          |
|------------------------------------------------------------------|---|----------------------------------------|----------------------------------------|----------------------|----------|------------------------------|
| 46                                                               | H | 3.032±0.776<br>(0.906)                 | 2.482±0.214<br>(0.984)*                | —                    | —        | 26.2<br>NA                   |
| 47                                                               | M | 3.259±0.429<br>(1.0)**                 | 2.507±0.086<br>(1.0)**                 | —                    | —        | 52.7<br>Exposed              |
| 48                                                               | T | 3.187±0.574<br>(0.970)*                | 2.496±0.158<br>(0.993)**               | —                    | —        | 22.5<br>NA                   |
| 53                                                               | Y | 3.149±0.634<br>(0.954)*                | 2.491±0.179<br>(0.990)**               | —                    | —        | 31.6<br>NA                   |
| 54                                                               | K | 3.190±0.568<br>(0.971)*                | 2.499±0.142<br>(0.995)**               | —                    | —        | 41.3<br>Part. Exposed        |
| 55                                                               | P | <b>3.258±0.432</b><br><b>(0.999)**</b> | <b>2.507±0.088</b><br><b>(1.0)**</b>   | <i>V<sup>o</sup></i> | <b>6</b> | 40.9<br><b>Part. Exposed</b> |
| 56                                                               | D | <b>3.197±0.556</b><br><b>(0.974)*</b>  | <b>2.500±0.136</b><br><b>(0.995)**</b> | <i>V<sup>o</sup></i> | <b>6</b> | 46.2<br><b>Part. Exposed</b> |
| 57                                                               | E | <b>2.879±0.907</b><br><b>(0.843)</b>   | <b>2.473±0.241</b><br>(0.979)*         | <i>V<sup>o</sup></i> | <b>6</b> | 88.3<br><b>Exposed</b>       |
| 58                                                               | N | <b>3.215±0.524</b><br><b>(0.981)*</b>  | <b>2.499±0.140</b><br>(0.995)**        | <i>V<sup>o</sup></i> | <b>6</b> | 86.5<br><b>Exposed</b>       |
| 64                                                               | A | <b>3.241±0.471</b><br><b>(0.992)**</b> | <b>2.504±0.110</b><br>(0.998)**        | <i>V<sup>o</sup></i> | <b>6</b> | 32.4<br>NA                   |
| 70                                                               | R | 3.259±0.429<br>(1.0)**                 | 2.507±0.086<br>(1.0)**                 | —                    | —        | 52.2<br>Exposed              |
| 71                                                               | M | 3.073±0.732<br>(0.922)                 | 2.485±0.203<br>(0.986)*                | —                    | —        | 90.6<br>Exposed              |
| 74                                                               | T | <b>3.217±0.521</b><br><b>(0.982)*</b>  | <b>2.501±0.130</b><br>(0.996)**        | <i>V<sup>o</sup></i> | <b>6</b> | 100<br><b>Exposed</b>        |
| 76                                                               | K | <b>3.258±0.432</b><br><b>(0.999)**</b> | <b>2.507±0.089</b><br><b>(1.0)**</b>   | <i>V<sup>o</sup></i> | <b>6</b> | 82<br><b>Exposed</b>         |
| 77                                                               | S | <b>3.084±0.720</b><br><b>(0.927)</b>   | <b>2.483±0.210</b><br>(0.985)*         | <i>V<sup>o</sup></i> | <b>6</b> | 100<br><b>Exposed</b>        |
| 80                                                               | R | <b>2.457±1.092</b><br><b>(0.670)</b>   | <b>2.426±0.353</b><br>(0.951)*         | <i>V<sup>o</sup></i> | <b>6</b> | 64.8<br><b>Exposed</b>       |
| 85                                                               | T | <b>3.256±0.437</b><br><b>(0.998)**</b> | <b>2.506±0.092</b><br>(0.999)**        | <i>V<sup>o</sup></i> | <b>6</b> | 83.4<br><b>Exposed</b>       |
| 86                                                               | G | <b>3.257±0.434</b><br><b>(0.999)**</b> | <b>2.506±0.091</b><br><b>(1.0)**</b>   | <i>V<sup>o</sup></i> | <b>6</b> | 49.7<br><b>Exposed</b>       |
| 88                                                               | S | 3.131±0.658<br>(0.947)                 | 2.493±0.171<br>(0.991)**               | —                    | —        | 34.8<br>NA                   |
| 91                                                               | S | 3.259±0.428<br>(1.0)**                 | 2.507±0.085<br>(1.0)**                 | —                    | —        | 64.7<br>Exposed              |
| 92                                                               | D | 2.905±0.896<br>(0.850)                 | 2.432±0.351<br>(0.954)**               | —                    | —        | 34.9<br>NA                   |
| <b>Plesiotypic <math>\alpha</math>-neurotoxins from Elapidae</b> |   |                                        |                                        |                      |          |                              |
| 7                                                                | S | 3.499±0.841<br>(0.919)                 | 3.474±0.525<br>(0.969)*                | —                    | —        | —                            |

| Site |   | CodeML                   |                          | TreeSAAP |   | ASA                  |
|------|---|--------------------------|--------------------------|----------|---|----------------------|
| 28   | S | 3.485±0.864<br>(0.913)   | 3.451±0.581<br>(0.961)*  | —        | — | 77.6<br>Exposed      |
| 30   | Y | 3.692±0.532<br>(0.986)*  | 3.549±0.296<br>(0.996)** | —        | — | 63.0<br>Exposed      |
| 33   | P | 3.731±0.433<br>(0.999)** | 3.56±0.245<br>(1.0)**    | —        | — | 66.5<br>Exposed      |
| 34   | N | 3.694±0.529<br>(0.986)*  | 3.549±0.297<br>(0.996)** | —        | — | 87.7<br>Exposed      |
| 35   | S | 3.597±0.707<br>(0.953)*  | 3.518±0.407<br>(0.985)*  | —        | — | 85.8<br>Exposed      |
| 39   | P | 3.69±0.54<br>(0.985)*    | 3.545±0.314<br>(0.994)** | —        | — | 85.3<br>Exposed      |
| 40   | D | 3.724±0.455<br>(0.996)** | 3.558±0.255<br>(0.999)** | —        | — | 66.1<br>Exposed      |
| 44   | I | 3.718±0.47<br>(0.994)**  | 3.556±0.264<br>(0.998)** | —        | — | 14.8<br>Buried       |
| 48   | R | 3.68±0.561<br>(0.981)*   | 3.543±0.32<br>(0.994)**  | —        | — | 57.5<br>Exposed      |
| 50   | W | 3.549±0.776<br>(0.937)   | 3.498±0.461<br>(0.978)*  | —        | — | 41.3<br>Par. exposed |
| 52   | T | 3.729±0.44<br>(0.998)**  | 3.559±0.248<br>(1.0)**   | —        | — | 65.8<br>Exposed      |
| 53   | A | 3.724±0.453<br>(0.997)** | 3.558±0.254<br>(0.999)** | —        | — | 91.8<br>Exposed      |
| 54   | V | 3.733±0.426<br>(1.0)**   | 3.56±0.242<br>(1.0)**    | —        | — | 96.8<br>Exposed      |
| 55   | R | 3.712±0.486<br>(0.992)** | 3.553±0.276<br>(0.998)** | —        | — | 100.0<br>Exposed     |
| 57   | R | 3.721±0.463<br>(0.995)** | 3.557±0.259<br>(0.999)** | —        | — | 42.2<br>Par. exposed |
| 58   | E | 3.695±0.526<br>(0.986)*  | 3.549±0.294<br>(0.996)** | —        | — | 87.0<br>Exposed      |
| 59   | I | 3.399±0.948<br>(0.885)   | 3.43±0.616<br>(0.954)*   | —        | — | 9.3<br>Buried        |
| 60   | R | 3.733±0.427<br>(1.0)**   | 3.56±0.242<br>(1.0)**    | —        | — | 91.7<br>Exposed      |
| 69   | P | 3.708±0.495<br>(0.991)** | 3.553±0.277<br>(0.997)** | —        | — | 91.7<br>Exposed      |
| 70   | S | 3.715±0.477<br>(0.993)** | 3.555±0.27<br>(0.998)**  | —        | — | 11.8<br>Buried       |
| 72   | L | 3.712±0.486<br>(0.992)** | 3.554±0.275<br>(0.998)** | —        | — | 88.4<br>Exposed      |
| 73   | G | 3.65±0.622<br>(0.971)*   | 3.533±0.358<br>(0.990)** | —        | — | 54.0<br>Exposed      |



| Site |   | CodeML                   |                          | TreeSAAP |   | ASA                  |
|------|---|--------------------------|--------------------------|----------|---|----------------------|
| 74   | L | 3.687±0.543<br>(0.984)*  | 3.546±0.306<br>(0.995)** | —        | — | 25.2<br>NA           |
| 75   | T | 3.722±0.459<br>(0.996)** | 3.557±0.258<br>(0.999)** | —        | — | 39.8<br>Par. exposed |
| 77   | F | 3.725±0.451<br>(0.997)** | 3.558±0.254<br>(0.999)** | —        | — | 42.7<br>Par. exposed |
| 83   | N | 3.602±0.697<br>(0.955)*  | 3.523±0.389<br>(0.987)*  | —        | — | 69.0<br>Exposed      |
| 86   | H | 3.733±0.428<br>(1.0)**   | 3.56±0.243<br>(1.0)**    | —        | — | 100.0<br>Exposed     |

**Viperidae 3FTxs**

|    |   |                                        |                                        |               |             |                                    |
|----|---|----------------------------------------|----------------------------------------|---------------|-------------|------------------------------------|
| 7  | I | 6.037±0.994<br>(0.983)*                | 5.932±0.85<br>(0.991)**                | —             | —           | —                                  |
| 18 | S | <b>5.874±1.314</b><br><b>(0.953)*</b>  | <b>5.825±1.11</b><br><b>(0.971)*</b>   | <i>El, αc</i> | <b>7, 6</b> | —                                  |
| 23 | E | <b>5.796±1.430</b><br><b>(0.939)</b>   | <b>5.784±1.186</b><br><b>(0.963)*</b>  | <i>El, αc</i> | <b>7, 6</b> | —                                  |
| 25 | Y | <b>6.123±0.76</b><br><b>(0.999)**</b>  | <b>5.979±0.705</b><br><b>(1.0)**</b>   | <i>El, αc</i> | <b>7, 6</b> | —                                  |
| 28 | N | <b>5.995±1.086</b><br><b>(0.975)*</b>  | <b>5.908±0.914</b><br><b>(0.986)*</b>  | <i>El, Pr</i> | <b>7, 8</b> | —                                  |
| 29 | M | <b>6.128±0.744</b><br><b>(1.0)**</b>   | <b>5.981±0.697</b><br><b>(1.0)**</b>   | <i>El, Pr</i> | <b>7, 8</b> | —                                  |
| 30 | T | <b>6.128±0.745</b><br><b>(1.0)**</b>   | <b>5.981±0.698</b><br><b>(1.0)**</b>   | <i>El, Pr</i> | <b>7, 8</b> | —                                  |
| 31 | F | <b>6.12±0.77</b><br><b>(0.998)**</b>   | <b>5.977±0.71</b><br><b>(0.999)**</b>  | <i>El, Pr</i> | <b>6, 8</b> | —                                  |
| 34 | L | <b>6.128±0.745</b><br><b>(1.0)**</b>   | <b>5.981±0.698</b><br><b>(1.0)**</b>   | <i>El, Pr</i> | <b>6, 8</b> | —                                  |
| 36 | R | <b>6.122±0.766</b><br><b>(0.999)**</b> | <b>5.978±0.709</b><br><b>(0.999)**</b> | <i>El, Pr</i> | <b>6, 8</b> | —                                  |
| 40 | E | <b>6.004±1.065</b><br><b>(0.977)*</b>  | <b>5.913±0.9</b><br><b>(0.987)*</b>    | <i>El, Pr</i> | <b>8, 7</b> | <b>100</b><br><b>Exposed</b>       |
| 42 | L | <b>6.07±0.913</b><br><b>(0.989)*</b>   | <b>5.952±0.792</b><br><b>(0.995)**</b> | <i>El, Pr</i> | <b>8</b>    | <b>32.0</b><br><b>NA</b>           |
| 49 | K | <b>6.042±0.984</b><br><b>(0.984)*</b>  | <b>5.934±0.844</b><br><b>(0.991)**</b> | <i>El</i>     | <b>8</b>    | <b>48.8</b><br><b>Par. Exposed</b> |
| 51 | — | <b>6.126±0.753</b><br><b>(0.999)**</b> | <b>5.98±0.702</b><br><b>(1.0)**</b>    | <i>El</i>     | <b>8</b>    | <b>100</b><br><b>Exposed</b>       |
| 54 | L | 5.757±1.510<br>(0.932)                 | 5.716±1.325<br>(0.951)*                | —             | —           | —                                  |
| 55 | F | 6.106±0.815<br>(0.996)**               | 5.969±0.738<br>(0.998)**               | —             | —           | 16.1<br>Buried                     |
| 56 | P | 6.037±0.995<br>(0.983)*                | 5.932±0.851<br>(0.991)**               | —             | —           | 100<br>Exposed                     |

| Site            |   | CodeML                                 |                                        | TreeSAAP                 |         | ASA                                |
|-----------------|---|----------------------------------------|----------------------------------------|--------------------------|---------|------------------------------------|
| 57              | V | 5.757±1.485<br>(0.932)                 | 5.754±1.241<br>(0.958)*                | —                        | —       | 91.3<br>Exposed                    |
| 58              | L | 5.965±1.156<br>(0.969)*                | 5.878±0.996<br>(0.980)*                | —                        | —       | 42.9<br>Par. Exposed               |
| 59              | K | 5.818±1.400<br>(0.943)                 | 5.795±1.166<br>(0.965)*                | —                        | —       | 64.2<br>Exposed                    |
| 61              | E | 5.780±1.449<br>(0.936)                 | 5.775±1.199<br>(0.962)*                | —                        | —       | 55.2<br>Exposed                    |
| 70              | Q | <b>5.939±1.205</b><br><b>(0.965)*</b>  | <b>5.863±1.029</b><br><b>(0.978)*</b>  | <i>Pr</i>                | 7       | <b>100.0</b><br><b>Exposed</b>     |
| 72              | W | <b>6.127±0.75</b><br><b>(1.0)**</b>    | <b>5.98±0.7</b><br><b>(1.0)**</b>      | <i>Pr, αc</i>            | 7, 6    | <b>98.5</b><br><b>Exposed</b>      |
| 73              | T | <b>6.119±0.775</b><br><b>(0.998)**</b> | <b>5.977±0.712</b><br><b>(0.999)**</b> | <i>Pr, αc</i>            | 7, 6    | <b>43.5</b><br><b>Par. Exposed</b> |
| 74              | D | <b>6.069±0.913</b><br><b>(0.989)*</b>  | <b>5.953±0.788</b><br><b>(0.995)**</b> | <i>Pr, αc</i>            | 7, 6    | <b>2.8</b><br><b>Buried</b>        |
| 75              | K | <b>5.802±1.430</b><br><b>(0.940)</b>   | <b>5.773±1.212</b><br><b>(0.961)*</b>  | <i>El, Pr, αc</i>        | 8, 7, 6 | <b>92.4</b><br><b>Exposed</b>      |
| 78              | E | <b>6.109±0.804</b><br><b>(0.996)**</b> | <b>5.972±0.728</b><br><b>(0.998)**</b> | <i>El, Pr, αc</i>        | 8, 7, 6 | <b>70.8</b><br><b>Exposed</b>      |
| 80              | N | <b>5.885±1.287</b><br><b>(0.955)*</b>  | <b>5.848±1.053</b><br><b>0.975*</b>    | <i>El, αc</i>            | 8, 6    | <b>98.7</b><br><b>Exposed</b>      |
| 81              | K | <b>6.112±0.795</b><br><b>(0.997)**</b> | <b>5.973±0.724</b><br><b>(0.999)**</b> | <i>El, αc</i>            | 8, 6    | <b>83.2</b><br><b>Exposed</b>      |
| 84              | I | 6.127±0.747<br>(1.0)**                 | 5.981±0.698<br>(1.0)**                 | —                        | —       | —                                  |
| κ-bungarotoxins |   |                                        |                                        |                          |         |                                    |
| 37              | Q | 8.983±1.705<br>0.982*                  | 8.708±1.708<br>(0.989)*                | —                        | —       | 49.1<br>Par. Exposed               |
| 44              | L | 9.069±1.500<br>0.993**                 | 8.761±1.593<br>(0.995)**               | —                        | —       | 40<br>Par. Exposed                 |
| 47              | Q | 9.121±1.355<br>(0.999)**               | 8.792±1.515<br>(0.999)**               | —                        | —       | 57.6<br>Exposed                    |
| 50              | K | 8.956±1.761<br>0.979*                  | 8.692±1.74<br>(0.987)*                 | —                        | —       | 39.8<br>Par. Exposed               |
| 53              | S | 9.126±1.341<br>(1.0)**                 | 8.795±1.507<br>(1.0)**                 | —                        | —       | 62.7<br>Exposed                    |
| Cytotoxins      |   |                                        |                                        |                          |         |                                    |
| 50              | T | 7.473±1.990<br>(0.996)**               | 6.602±2.042<br>(0.999)**               | <i>Pα, K<sup>0</sup></i> | 6, 7    | 75.2<br>Exposed                    |
| 51              | P | 7.435±2.057<br>(0.988)*                | 6.590±2.062<br>(0.996)**               | <i>Pα, K<sup>0</sup></i> | 6, 7    | 45.7<br>Part. exposed              |

**Amino-acid property symbols used:**  $\alpha$ -helical tendencies ( $P\alpha$ ), Compressibility ( $K^0$ ), Equilibrium constant (ionization of COOH) ( $pK^I$ ), Hydropathy ( $h$ ), Long-range n.b. energy ( $El$ ), Normalized consensus hydrophobicity ( $Hnc$ ), Partial specific volume ( $V^0$ ), Polar requirement ( $Pr$ ), Power to be at C-terminus of  $\alpha$ -helix ( $\alpha c$ ), Short and medium-range n.b. energy ( $Esm$ ), Solvent accessible reduction ratio ( $R\alpha$ ) and Surrounding hydrophobicity ( $Hp$ ).

**Legend:**

**a:** M2a Bayes Empirical Bayes (BEB) posterior probability (\*  $\geq 0.95$ ; \*\*  $\geq 0.99$ ) and post-mean omega indicated in brackets

**b:** M8 Bayes Empirical Bayes (BEB) posterior probability (\*  $\geq 0.95$ ; \*\*  $\geq 0.99$ ) and post-mean omega indicated in brackets

**c:** amino acid property under selection

**d:** magnitude of selection on the amino acid property

**ASA:** Accessible surface area (50%  $\geq$  Side chains completely exposed; 20%  $\leq$  Side chains buried)

**Part. exposed:** Partially exposed side-chains (ASA: 40%-50%)

Sites detected as positively selected by both nucleotide and amino acid-level analyses are indicated in bold.

**Supplementary Table 12. Surface accessibility of Three-finger toxins**

**Type I  $\alpha$ -neurotoxin**

|                                          |          |
|------------------------------------------|----------|
| <b>Total Residues</b>                    | 62       |
| <b>Total Exposed</b>                     | 33       |
| <b>Total Buried</b>                      | 10       |
| <b>Exposed PS</b>                        | 15 (24%) |
| <b>Buried PS</b>                         | 2 (3%)   |
| <b>Frequency of exposed PS sites (a)</b> | 45%      |
| <b>Frequency of buried PS sites (b)</b>  | 20%      |
| <b>Exposure Ratio (a/b)</b>              | 2.3%     |

**Type II  $\alpha$ -neurotoxin**

|                                          |          |
|------------------------------------------|----------|
| <b>Total Residues</b>                    | 74       |
| <b>Total Exposed</b>                     | 29       |
| <b>Total Buried</b>                      | 20       |
| <b>Exposed PS</b>                        | 14 (19%) |
| <b>Buried PS</b>                         | 3 (4%)   |
| <b>Frequency of exposed PS sites (a)</b> | 48%      |
| <b>Frequency of buried PS sites (b)</b>  | 15%      |
| <b>Exposure Ratio (a/b)</b>              | 3.2%     |

**Type III  $\alpha$ -neurotoxin**

|                                          |          |
|------------------------------------------|----------|
| <b>Total Residues</b>                    | 57       |
| <b>Total Exposed</b>                     | 28       |
| <b>Total Buried</b>                      | 14       |
| <b>Exposed PS</b>                        | 20 (35%) |
| <b>Buried PS</b>                         | 3 (5%)   |
| <b>Frequency of exposed PS sites (a)</b> | 71%      |
| <b>Frequency of buried PS sites (b)</b>  | 21%      |
| <b>Exposure Ratio (a/b)</b>              | 3.3%     |

**'Non-front-fanged' Advanced Snakes**

|                                          |          |
|------------------------------------------|----------|
| <b>Total Residues</b>                    | 74       |
| <b>Total Exposed</b>                     | 32       |
| <b>Total Buried</b>                      | 17       |
| <b>Exposed PS</b>                        | 25 (34%) |
| <b>Buried PS</b>                         | 3 (4%)   |
| <b>Frequency of exposed PS sites (a)</b> | 78%      |
| <b>Frequency of buried PS sites (b)</b>  | 18%      |
| <b>Exposure Ratio (a/b)</b>              | 4.4%     |

**Viperidae**

|                                          |          |
|------------------------------------------|----------|
| <b>Total Residues</b>                    | 46       |
| <b>Total Exposed</b>                     | 23       |
| <b>Total Buried</b>                      | 8        |
| <b>Exposed PS</b>                        | 15 (33%) |
| <b>Buried PS</b>                         | 2 (4%)   |
| <b>Frequency of exposed PS sites (a)</b> | 65%      |
| <b>Frequency of buried PS sites (b)</b>  | 25%      |
| <b>Exposure Ratio (a/b)</b>              | 2.6%     |

**Elapidae**

|                                          |          |
|------------------------------------------|----------|
| <b>Total Residues</b>                    | 65       |
| <b>Total Exposed</b>                     | 32       |
| <b>Total Buried</b>                      | 14       |
| <b>Exposed PS</b>                        | 23 (35%) |
| <b>Buried PS</b>                         | 3 (5%)   |
| <b>Frequency of exposed PS sites (a)</b> | 72%      |
| <b>Frequency of buried PS sites (b)</b>  | 21%      |
| <b>Exposure Ratio (a/b)</b>              | 3.4%     |

**κ-neurotoxins**

|                                          |        |
|------------------------------------------|--------|
| <b>Total Residues</b>                    | 132    |
| <b>Total Exposed</b>                     | 47     |
| <b>Total Buried</b>                      | 42     |
| <b>Exposed PS</b>                        | 3 (2%) |
| <b>Buried PS</b>                         | 0      |
| <b>Frequency of exposed PS sites (a)</b> | 6%     |
| <b>Frequency of buried PS sites (b)</b>  | 0      |
| <b>Exposure Ratio (a/b)</b>              | —      |

**Cytotoxins**

|                                          |        |
|------------------------------------------|--------|
| <b>Total Residues</b>                    | 60     |
| <b>Total Exposed</b>                     | 28     |
| <b>Total Buried</b>                      | 15     |
| <b>Exposed PS</b>                        | 2 (3%) |
| <b>Buried PS</b>                         | 0      |
| <b>Frequency of exposed PS sites (a)</b> | 7%     |
| <b>Frequency of buried PS sites (b)</b>  | 0      |
| <b>Exposure Ratio (a/b)</b>              | —      |

**Legend:** PS: Positively selected

**Note:**

- Type I α-neurotoxins had 39.4% of the exposed residues and 20% of the buried residues under positive selection. Thus, the exposed residues being **1.9 times** more likely to be positively selected than buried residues.
- Type II α-neurotoxins had 36.8% of the exposed residues and 15% of the buried residues under positive selection. Thus, the exposed residues being **2.5 times** more likely to be positively selected than buried residues.
- Type III α-neurotoxin had 58.8% of the exposed residues and 21.4% of the buried residues under positive selection. Thus, the exposed residues being **2.7 times** more likely to be positively selected than buried residues.
- The plesiotypic ‘non-front-fanged’ advanced snake 3FTx had 62.5% of the exposed residues and 17.6% of the buried residues under positive selection. Thus, the exposed residues being **3.5 times** more likely to be positively selected than buried residues.
- The plesiotypic Viperidae 3FTx had 51.7% of the exposed residues and 25% of the buried residues under positive selection. Thus, the exposed residues being **2.1 times** more likely to be positively selected than buried residues.
- The plesiotypic Elapidae 3FTx had 58.9% of the exposed residues positively selected while 21.4% of the buried residues under positive selection. Thus, the exposed residues being **2.8 times** more likely to be positively selected than buried residues.
- κ-neurotoxins had 5% of the exposed residues under positive selection, while none of the buried residues were positively selected.
- Cytotoxic 3FTx had 5.8% of the exposed residues under positive selection, while none of the buried residues were positively selected.

**Supplementary Table 13. Structural and functional residues in 3FTx**

| 3FTx                                                  | Structurally and/or functionally important residue                                                                                                                                                                             | Reference                                                                        |
|-------------------------------------------------------|--------------------------------------------------------------------------------------------------------------------------------------------------------------------------------------------------------------------------------|----------------------------------------------------------------------------------|
| <b>α-neurotoxins</b>                                  |                                                                                                                                                                                                                                |                                                                                  |
| <b>Type I (short-chain)</b>                           | Q6 (87%), S8 (95%), S9 (95%), Q10 (87%), Y25 (invariant), K27 (94%), W29 (95%), D31 (91%), R33 (89%), G34 (94%), E38 (99%), G40 (invariant), P44 (99%), K47 (93%)                                                              | (Pillet et al. 1993; Treméau et al. 1995; Antil et al. 1999; Barber et al. 2013) |
| <b>Type II (long-chain)</b>                           | Y21 (72%), K23 (84%), W25 (98%), C26 (94%), D27 (91%), A28 (50%; PS), F29 (49%; PS), C30 (94%), R33 (83%), K35 (73%), R36 (very low; PS), G40 (invariant), P46 (98%), K49 (70%), F65 (very low; PS)                            | (Antil et al. 1999; Antil-Delbeke et al. 2000; Barber et al. 2013)               |
| <b>Type III</b>                                       | L1 (invariant), T20 (98%), S43 (90%), V51 (91%), S54 (91%), T55 (93%), D56 (invariant), N59 (invariant)                                                                                                                        | Predicted in this study as putative functional/structural residue                |
| <b>Plesiotypic ‘non-front-fanged’ advanced snakes</b> | E64 (95%), N75 (95%)                                                                                                                                                                                                           | Predicted in this study as putative functional/structural residue                |
| <b>Plesiotypic Elapidae 3FTx</b>                      | K28 (invariant), R42 (invariant), P49 (invariant), V57 (96%), T62 (93%), D63 (invariant), N66 (96%)                                                                                                                            | Predicted in this study as putative functional/structural residue                |
| <b>Viperidae 3FTx</b>                                 | P20 (90%), G45 (invariant), K59 (90%), T66 (90%), N70 (invariant)                                                                                                                                                              | Predicted in this study as putative functional/structural residue                |
|                                                       |                                                                                                                                                                                                                                |                                                                                  |
| <b>κ-bungarotoxin</b>                                 | R32 (invariant), P45 (invariant), F47 (invariant), L55 (invariant)                                                                                                                                                             | (Dewan et al. 1994)                                                              |
| <b>Cytotoxin</b>                                      | K5 (83%), Y11 (72%), K12 (invariant), K18 (97%), Y22 (invariant), K23 (invariant), M24 (94%), M26 (invariant), K31 (56%), K35 (invariant), G37 (invariant), P43 (invariant), K44 (invariant), K50 (invariant), Y51 (invariant) | (Kumar et al. 1997)                                                              |

**PS:** Positively selected.

**Percent identity:** has been indicated in parenthesis for each site.

**Very low:** very few sequences have the structurally/functionally important residue at this site.

**Note:** All site numbering corresponds to H8PG58 for short-chain, FJ752458.1 for long-chain, AF082975.1 for Type III, DQ366293.1 for basal 3FTx from ‘non-front-fanged’ advanced snakes, AY611643.1 for basal 3FTx from Elapidae, AY057872.1 for kappa and U42585.1 for cytotoxins.

## References

- Antil S, Servent D, Menez A. 1999. Variability among the sites by which curaremimetic toxins bind to torpedo acetylcholine receptor, as revealed by identification of the functional residues of alpha-cobratoxin. *J Biol Chem* 274:34851–34858.
- Antil-Delbeke S, Gaillard C, Tamiya T, Corringer PJ, Changeux JP, Servent D, Menez a. 2000. Molecular determinants by which a long chain toxin from snake venom interacts with the neuronal alpha 7-nicotinic acetylcholine receptor. *The Journal of biological chemistry* 275:29594–29601.
- Barber CM, Isbister GK, Hodgson WC. 2013. Alpha neurotoxins. *Toxicon : official journal of the International Society on Toxinology* 66C:47–58.
- Dewan JC, Grant GA, Sacchettini JC. 1994. Crystal structure of kappa-bungarotoxin at 2.3-Å resolution. *Biochemistry* 33:13147–13154.
- Kumar TK, Jayaraman G, Lee CS, Arunkumar AI, Sivaraman T, Samuel D, Yu C. 1997. Snake venom cardiotoxins-structure, dynamics, function and folding. *Journal of biomolecular structure dynamics* 15:431–463.
- Pillet L, Tremeau O, Ducancel F, Drevet P, Zinn-Justin S, Pinkasfeld S, Boulain JC, Menez A. 1993. Genetic engineering of snake toxins. Role of invariant residues in the structural and functional properties of a curaremimetic toxin, as probed by site-directed mutagenesis. *J Biol Chem* 268:909–916.
- Tremeau O, Lemaire C, Drevet P, Pinkasfeld S, Ducancel F, Boulain JC, Menez A. 1995. Genetic engineering of snake toxins. The functional site of Erabutoxin a, as delineated by site-directed mutagenesis, includes variant residues. *J Biol Chem* 270:9362–9369.
